# Supplementary material
Source: HighWire-hosted journal article supplement (https://jnnp.bmj.com/content/93/11/1166)

(from Gadot & Najera et al., 2021)

**Supplementary File A.** Detailed overview of all complications and adverse events from systematic review.

| <b>Serious Adverse Events (SAEs) – transient/permanent</b>                                                                                                                                                                                                             | <b>n</b> | <b>%</b> |
|------------------------------------------------------------------------------------------------------------------------------------------------------------------------------------------------------------------------------------------------------------------------|----------|----------|
| Surgery-related                                                                                                                                                                                                                                                        |          |          |
| Infection (surgically treated) – transient                                                                                                                                                                                                                             | 5        | 2.0      |
| Infection (antibiotics only) – transient                                                                                                                                                                                                                               | 5        | 2.0      |
| Intracranial hemorrhage (asymptomatic) – transient                                                                                                                                                                                                                     | 2        | 0.8      |
| Intracranial hemorrhage (w/ sequelae) <sup>1</sup> – permanent                                                                                                                                                                                                         | 2        | 0.8      |
| Device-related <sup>2</sup>                                                                                                                                                                                                                                            |          |          |
| Mispositioned electrodes – transient                                                                                                                                                                                                                                   | 8        | 3.2      |
| Allergy to device – transient                                                                                                                                                                                                                                          | 5        | 2.0      |
| Mispositioned pulse generator – transient                                                                                                                                                                                                                              | 2        | 0.8      |
| Lead breakage – transient                                                                                                                                                                                                                                              | 1        | 0.4      |
| Tension in cables – transient                                                                                                                                                                                                                                          | 1        | 0.4      |
| Pulse generator erosion through skin – transient                                                                                                                                                                                                                       | 1        | 0.4      |
| Unexpected battery depletion – transient                                                                                                                                                                                                                               | 1        | 0.4      |
| High impedance – transient                                                                                                                                                                                                                                             | 1        | 0.4      |
| Stimulation-induced                                                                                                                                                                                                                                                    |          |          |
| Pain associated with leads or pulse generator – permanent                                                                                                                                                                                                              | 15       | 6.0      |
| Increased libido – permanent                                                                                                                                                                                                                                           | 6        | 2.4      |
| Seizures (generalized tonic-clonic) – transient                                                                                                                                                                                                                        | 5        | 2.4      |
| Seizures (absences or partial) – transient                                                                                                                                                                                                                             | 3        | 1.2      |
| Forgetfulness – permanent                                                                                                                                                                                                                                              | 3        | 1.2      |
| Micturition, enuresis, polyuria – permanent                                                                                                                                                                                                                            | 2        | 0.8      |
| <i>De novo</i> obsession associated with DBS therapy/device – permanent                                                                                                                                                                                                | 2        | 0.8      |
| Word-finding difficulties – permanent                                                                                                                                                                                                                                  | 1        | 0.4      |
| Increased irritability, anger, impulsivity – permanent                                                                                                                                                                                                                 | 1        | 0.4      |
| Sleep disorder – permanent                                                                                                                                                                                                                                             | 1        | 0.4      |
| Compulsive gambling – permanent                                                                                                                                                                                                                                        | 1        | 0.4      |
| Other <sup>3</sup>                                                                                                                                                                                                                                                     |          |          |
| Suicide attempts                                                                                                                                                                                                                                                       | 6        | 2.4      |
| Suicide                                                                                                                                                                                                                                                                | 1        | 0.4      |
| <sup>1</sup> Sequelae include permanent finger palsy (1) & permanent dysarthria (1)                                                                                                                                                                                    |          |          |
| <sup>2</sup> Excludes expected battery depletion and subsequent pulse generator replacement; includes only those SAEs where unexpected surgical revision, removal, or replacement of leads/pulse generator were required                                               |          |          |
| <sup>3</sup> In 1 patient the following occurred (not included in previously listed SAEs): generalized tonic-clonic seizure, bronchopneumonia, intracranial infection, pleural effusion, pneumothorax, shock, axillary vein thrombosis, pharmacologically induced coma |          |          |

(from Gadot &amp; Najera et al., 2021)

| <b>Transient, Non-Serious, Stimulation-Induced Adverse Events</b>        | <b>n</b> | <b>%</b> |
|--------------------------------------------------------------------------|----------|----------|
| Hypomania                                                                | 30       | 25.2     |
| Gastrointestinal upset (nausea, vomiting/emesis, diarrhea, stomachaches) | 7        | 5.9      |
| Worse anxiety                                                            | 6        | 5.0      |
| Sleep disorder                                                           | 6        | 5.0      |
| Headaches                                                                | 5        | 4.2      |
| Dysgeusia/ageusia                                                        | 4        | 3.4      |
| Worse depression                                                         | 3        | 2.5      |
| Tiredness                                                                | 3        | 2.5      |
| Paresthesias in hands or feet                                            | 3        | 2.5      |
| Disinhibition                                                            | 3        | 2.5      |
| Jaw sensations                                                           | 2        | 1.7      |
| Facial asymmetry                                                         | 2        | 1.7      |
| Aggression                                                               | 2        | 1.7      |
| Difficulty with concentration                                            | 2        | 1.7      |
| Significant weight gain (> 20%)                                          | 2        | 1.7      |
| Dysphagia                                                                | 1        | 0.8      |
| Walking difficulties                                                     | 1        | 0.8      |
| Dyskinesias                                                              | 1        | 0.8      |
| Worse obsessions                                                         | 1        | 0.8      |
| Dyspnea                                                                  | 1        | 0.8      |
| Sexual intrusions                                                        | 1        | 0.8      |
| Dizziness                                                                | 1        | 0.8      |
| Forgetfulness                                                            | 1        | 0.8      |
| Dysarthria                                                               | 1        | 0.8      |
| Visual disturbance                                                       | 1        | 0.8      |
| Vertigo                                                                  | 1        | 0.8      |
| Olfactory hallucinations                                                 | 1        | 0.8      |
| Déjà vu                                                                  | 1        | 0.8      |
| Tingling or other sensation in chest wall                                | 1        | 0.8      |
| Reduced libido                                                           | 1        | 0.8      |
| Sympathetic signs (flushing, tachycardia, hypertension)                  | 1        | 0.8      |

**Supplementary File B. Thompson & Sharp Test for Funnel Plot Asymmetry.** Standardized treatment effect plotted as a predictor weighted by the inverse variance. Non-significant effect seen suggesting random dispersion of treatment effect irrespective of study size. Additive residual heterogeneity variance by the DerSimonian-Laird method for  $\tau^2 = 14.5481$ .

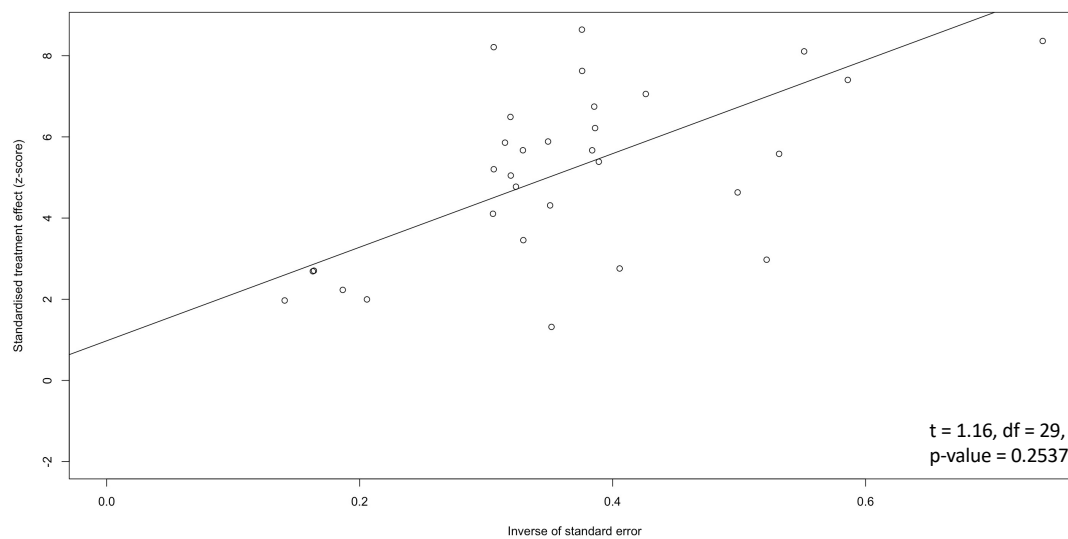

Supplement: inline-supplementary-material-2 [file inline-supplementary-material-2.pdf]
